# Supplementary material for: Increased neutralization potency and breadth elicited by a SARS-CoV-2 mRNA vaccine forming virus-like particles
Source: PubMed Central journal article supplement — Proc Natl Acad Sci U S A. 2023 Jul 10;120(29):e2305896120. doi: 10.1073/pnas.2305896120 (PMC10629519; doi:10.1073/pnas.2305896120), 2023-07-10
Supplement: pnas.2305896120.sapp.pdf [file pnas.2305896120.sapp.pdf]

# Figure S1

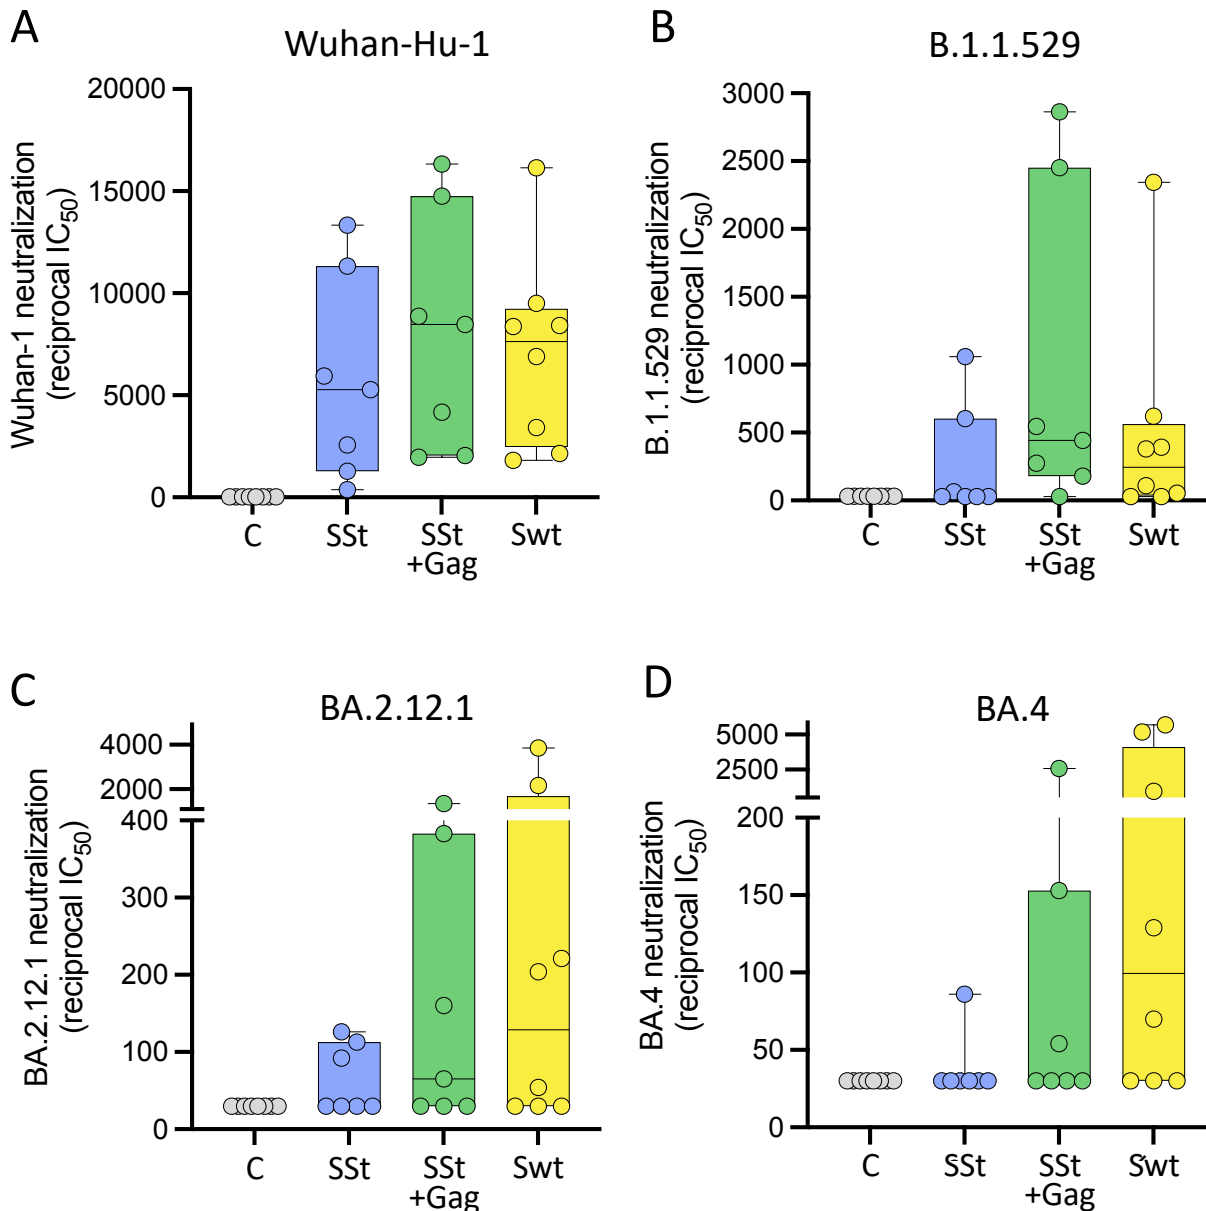

**Figure S1.** Neutralization of autologous and heterologous SARS-CoV-2 strains in mice immunized with the vaccines indicated below the x axis at study termination (day 330). (A) Autologous virus (Wuhan-Hu-1). (B) Omicron variant (B.1.1.529). (C) Omicron subvariant BA.2.12.1. (D) Omicron subvariant BA.4. The median titer is indicated by a horizontal line in each box. No statistical differences were seen by either parametric or non-parametric *t*-tests presumably due to the wide data dispersion.
